# Supplementary material for: Freezing and thawing cycles affect nitrous oxide emissions in rain-fed lucerne (Medicago sativa) grasslands of different ages
Source: PeerJ. 2021 Oct 5;9:e12216. doi: 10.7717/peerj.12216 (PMC8501990; doi:10.7717/peerj.12216)
Supplement: Supplemental Information 2 [file peerj-09-12216-s002.xlsx]

## Sheet: Fig 1 A
		CK				4-year				11-year
	MEAN	SD	SE		MEAN	SD	SE		MEAN	SD	SE			LSD0.05
0	0.0120333	0.000587055	0.00169468		0.0144	0.0011944	0.00108333		-0.0603875	0.00765435	-0.0160714		0.15	0.00948	0.0237
1	0.0112667	0.00124428	0.00359193		-0.007825	0.00167655	-0.00192656		0.0133	0.00997446	0.00242187		0.15	0.002274	0.005685
2	0.0216167	0.00175887	0.00427428		-0.0195875	0.00113362	-0.00388906		0.0792625	0.0157989	-0.0145536		0.15	0.01318	0.03295
3	0.0306	0.00376729	0.00587524		-0.0156125	0.00186491	0.00405313		-0.06265	0.00690683	-0.0158772		0.15	0.01091	0.027275
4	-0.04135	0.00261501	0.0075489		-0.0139125	0.00144052	-0.00555781		-0.016975	0.000823873	-0.00248661		0.15	0.003293	0.0082325
5	0.104483	0.0137307	0.019637		-0.014625	0.00145896	0.00565		-0.0350875	0.0118378	-0.0212634		0.15	0.02033	0.050825
6	0.0654	0.00513758	0.0148309		-0.0094125	0.00121511	0.000957812		0.057475	0.00995873	0.0177656		0.15	0.01312	0.0328
7	-0.0411167	0.00575512	0.00661361		0.027425	0.00331512	-0.00334531		-0.0328875	0.00300993	0.00987202		0.15	0.0075	0.01875
8	-0.0393	0.00389847	0.00625393		0.0327375	0.00276084	0.00914375		0.0573125	0.00842636	0.0153058		0.15	0.00936	0.0234
9	-0.0453833	0.00523226	0.0101042		-0.0222125	0.0048502	0.0175922		0.0364125	0.00233801	-0.0136875		0.15	0.00702	0.01755
10	-0.0547167	0.00327135	0.00944358		0.0117	0.00136921	0.00224531		0.07945	0.0142036	0.0181027		0.15	0.00611	0.015275
11	-0.0399167	0.00469475	0.00855256		0.012225	0.000703728	0.00716406		0.0137625	0.00225389	0.0090558		0.15	0.0063	0.01575
12	-0.04235	0.000919946	0.00265565		0.0106625	0.000733911	0.00353125		-0.0321625	0.00477065	0.00597768		0.15	0.005149	0.0128725
13	-0.0423333	0.00685634	0.00979256		0.007025	0.000738173	0.00174062		-0.0200125	0.00197579	0.0104085		0.15	0.00837	0.020925
14	-0.0447	0.00215195	0.00621215		0.0049	0.000462169	0.00875417		0.0139875	0.00173044	0.00888839		0.15	0.003415	0.0085375
15	-0.03755	0.00583201	0.00683555		0.0027375	0.000287446	0.0043875		0.0298375	0.00575369	0.0109353		0.15	0.00702	0.01755
16	-0.02485	0.0031718	0.00415619		-0.0016875	0.000225296	0.00312344		-0.0373125	0.00379027	0.00389509		0.15	0.00647	0.016175
17	0.0525	0.00364336	0.0105175		-0.0025	0.000193735	-0.000882812		0.0197875	0.00369289	-0.0089375		0.15	0.004812	0.01203
18	0.0696167	0.00473727	0.0136753		-0.0054	0.000386868	-0.00215938		0.0492875	0.00231901	0.0183036		0.15	0.00606	0.01515
19	0.0567833	0.0066202	0.0141109		-0.006825	0.00046105	-0.00450313		0.042075	0.00646479	0.017875		0.15	0.01084	0.0271
20	0.0497333	0.00578775	0.0117078		-0.007675	0.00111775	-0.00330313		-0.0621625	0.00984638	0.018846		0.15	0.0107	0.02675
21	0.0413167	0.00479996	0.0088563		-0.0030125	0.000399948	-0.00247656		0.076275	0.0120033	0.0104263		0.15	0.01683	0.042075
22	-0.0551667	0.00130328	0.00376224		-0.00505	0.000909542	-0.00102891		0.0603	0.00723177	0.0179665		0.15	0.005828	0.01457
23	0.0309	0.00581619	0.0067899		-0.008025	0.0011318	-0.000782812		-0.059875	0.00912268	0.00364955		0.15	0.01256	0.0314
	0.00156319				-0.000814583				0.00870885

## Sheet: Fig 1 B
		CK				4-year				11-year
	MEAN	SD	SE		MEAN	SD	SE		MEAN	SD	SE			LSD0.05
0	-0.06515	0.00948964	0.0273942		-0.025475	0.00285851	0.00714628		0.047525	0.0067881	0.0169702		0.3	0.01236	0.0309
1	-0.0788667	0.00482131	0.0139179		0.025375	0.00208564	0.0052141		0.0478625	0.00871808	0.0217952		0.3	0.01291	0.032275
2	0.00986667	0.000994502	0.00287088		0.0313375	0.00245254	0.00613135		0.0566375	0.00620618	0.0155154		0.3	0.002989	0.0074725
3	0.0718333	0.00627363	0.0181104		0.0328375	0.00193191	0.00482978		0.0408	0.00916791	0.0229198		0.3	0.00853	0.021325
4	-0.0288333	0.00274404	0.00792135		-0.022875	0.00147952	0.00369879		-0.066175	0.0164821	0.0412052		0.3	0.0233	0.05825
5	0.0350333	0.000565361	0.00163206		-0.059675	0.00793732	0.0198433		0.177113	0.0405877	0.046913		0.3	0.03196	0.0799
6	-0.0143833	0.000760548	0.00219551		-0.0916375	0.013768	0.03442		-0.08635	0.00700767	0.0175192		0.3	0.01479	0.036975
7	-0.0619	0.00415014	0.0119804		-0.0961375	0.00673091	0.0168273		-0.070175	0.0127659	0.0319146		0.3	0.01665	0.041625
8	-0.0125233	0.00233957	0.00675377		0.0541375	0.0065778	0.0164445		0.0724	0.0103217	0.0258042		0.3	0.01427	0.035675
9	-0.0207	0.00107531	0.00310416		-0.116638	0.013738	0.0343449		-0.080175	0.0125483	0.0313708		0.3	0.02162	0.05405
10	-0.104117	0.00487304	0.0140673		-0.158	0.00833098	0.0208275		-0.06515	0.00906462	0.0226616		0.3	0.01375	0.034375
11	-0.0577667	0.00479906	0.0138537		0.0663	0.00990831	0.0247708		-0.154388	0.0158512	0.0396281		0.3	0.02642	0.06605
12	-0.215367	0.01522	0.0439363		-0.0293125	0.00220958	0.00552394		0.0769	0.00544513	0.0136128		0.3	0.01941	0.048525
13	0.154867	0.0074972	0.0216426		-0.0307875	0.00130934	0.00327334		0.0267125	0.00233941	0.00584852		0.3	0.0094	0.0235
14	0.0376667	0.000903622	0.00260853		0.0212125	0.00428285	0.0107071		0.023875	0.00281658	0.00704144		0.3	0.00608	0.0152
15	0.095	0.0089889	0.0259487		0.025	0.00287867	0.00719667		0.0258875	0.00401152	0.0100288		0.3	0.01227	0.030675
16	0.106033	0.00766457	0.0221257		-0.01775	0.00228434	0.00571084		0.101687	0.0189651	0.0474126		0.3	0.02198	0.05495
17	0.145467	0.0210783	0.0608478		0.015425	0.00116406	0.00291015		-0.0698125	0.0125102	0.0312754		0.3	0.02721	0.068025
18	0.0697667	0.00227018	0.00655346		-0.0457	0.00374834	0.00937085		0.06565	0.0085649	0.0214122		0.3	0.01299	0.032475
19	-0.0784833	0.0118488	0.0342046		-0.134763	0.00820945	0.0205236		0.0567875	0.0110269	0.0275672		0.3	0.02087	0.052175
20	0.0325167	0.0011133	0.00321382		-0.09905	0.00482523	0.0120631		0.074275	0.0179432	0.0448581		0.3	0.02401	0.060025
21	-0.0246833	0.00169824	0.00490241		0.123412	0.00531301	0.0132825		0.062325	0.0114289	0.0285723		0.3	0.01766	0.04415
22	0.0748	0.00922194	0.0266214		-0.0812875	0.00621998	0.0155499		0.09085	0.0180461	0.0451153		0.3	0.02608	0.0652
23	0.1679	0.00822265	0.0237367		-0.1391	0.0131664	0.0329159		0.0833	0.0117768	0.0294421		0.3	0.01453	0.036325
	0.00991569				-0.0313812				0.0224318

## Sheet: Fig 1 C
		CK				4-year				11-year
	MEAN	SD	SE		MEAN	SD	SE		MEAN	SD	SE			LSD0.05
0	-0.0456333	0.00389072	0.0112316		0.075375	0.0104557	0.0261391		-0.0151375	0.00149881	0.00374702		0.2	0.0108	0.027
1	0.0363667	0.00125369	0.00361909		0.087	0.0187847	0.0319616		0.0232625	0.00400371	0.0100093		0.2	0.02545	0.063625
2	0.03155	0.00242365	0.00699649		-0.103512	0.0109577	0.0273942		0.0526375	0.00431501	0.0107875		0.2	0.01353	0.033825
3	-0.0232167	0.000695294	0.00200714		0.05425	0.0105059	0.0262648		0.0658	0.00831258	0.0207815		0.2	0.01777	0.044425
4	0.0156333	0.00259342	0.00748656		0.0695125	0.0195865	0.0489663		0.0847125	0.0108614	0.0271536		0.2	0.03032	0.0758
5	0.02785	0.00228322	0.00659109		-0.0824625	0.00691757	0.0172939		-0.035425	0.00382928	0.00957319		0.2	0.01077	0.026925
6	0.0219	0.00367016	0.0105948		0.049825	0.0123231	0.0308077		-0.03425	0.00393821	0.00984554		0.2	0.0177	0.04425
7	0.02555	0.00108503	0.00313222		-0.0756875	0.00560991	0.0140248		-0.042325	0.0080229	0.0200573		0.2	0.01101	0.027525
8	0.0021	0.00150921	0.0043567		-0.050625	0.00422851	0.0105713		-0.0218875	0.00163092	0.00407729		0.2	0.005671	0.0141775
9	-0.0934833	0.0109704	0.0316689		0.0419875	0.00700818	0.0175205		-0.0325625	0.00377617	0.00944044		0.2	0.01559	0.038975
10	-0.0365	0.00440331	0.0127112		0.0637	0.0100718	0.0251796		-0.061975	0.0117882	0.0294705		0.2	0.02244	0.0561
11	-0.0386667	0.00465526	0.0134386		-0.0704625	0.011533	0.0288325		-0.0714625	0.00810567	0.0202642		0.2	0.01737	0.043425
12	-0.0350667	0.00301225	0.00869561		-0.062675	0.0072698	0.0181745		-0.066925	0.00232588	0.00581469		0.2	0.01102	0.02755
13	-0.0417167	0.00250863	0.0072418		-0.08315	0.013293	0.0332325		-0.108162	0.00814825	0.0203706		0.2	0.01811	0.045275
14	-0.0142167	0.00161398	0.00465916		-0.0643125	0.0147964	0.0199099		-0.109425	0.0139361	0.0348403		0.2	0.02837	0.070925
15	-0.0609333	0.00868291	0.0250654		0.0160375	0.00322965	0.00807412		-0.136337	0.0138159	0.0345398		0.2	0.01559	0.038975
16	0.0189667	0.00372205	0.0107446		0.006225	0.00129842	0.00324606		-0.0644625	0.00740514	0.0185128		0.2	0.01098	0.02745
17	0.0330167	0.00572952	0.0165397		0.060825	0.0107011	0.0267528		-0.0753375	0.0119302	0.0298256		0.2	0.02343	0.058575
18	0.0425	0.0073363	0.0211781		0.066825	0.0101378	0.0253445		0.08045	0.0123373	0.0308433		0.2	0.01847	0.046175
19	0.0267833	0.00414116	0.0119545		0.0601875	0.00620156	0.0155039		0.151863	0.0103343	0.0258357		0.2	0.01465	0.036625
20	0.0158167	0.00222203	0.00641446		0.116788	0.00954049	0.0238512		-0.0413125	0.015531	0.0138274		0.2	0.01378	0.03445
21	0.0743	0.00672443	0.0194117		0.119688	0.0192015	0.0300363		-0.0563875	0.00494185	0.0123546		0.2	0.01906	0.04765
22	0.0268667	0.00401201	0.0115817		-0.058725	0.00779443	0.0194861		0.07095	0.0169269	0.0423172		0.2	0.02186	0.05465
23	0.0127167	0.00123711	0.00357122		0.098975	0.0155342	0.0388354		0.067575	0.00395345	0.00988362		0.2	0.02079	0.051975
	0.000936806				0.0139828				-0.0156719

## Sheet: Fig 1
		CK		09		02
Date	Time	CK	CK	4-year	4-year	11-year	11-year
2013-11-28	0	12.46	0	11.07	0	11.68	-1.2
	1	12.41	-0.3	11.08	-0.1	11.69	-1.2
	2	12.43	-0.6	11.08	-0.3	11.65	-1.4
	3	12.41	-0.7	11.07	-0.4	11.61	-1.4
	4	12.41	-0.7	11.06	-0.4	11.6	-1.5
	5	12.37	-0.9	11.03	-0.5	11.59	-1.5
	6	12.35	-1	11.04	-0.7	11.57	-1.5
	7	12.31	-1.1	11.05	-0.7	11.55	-1.5
	8	12.31	-1.2	11	-0.8	11.53	-1.5
	9	12.31	-1.2	11	-0.7	11.54	-1.4
	10	12.29	-1	11	-0.7	11.53	-1.5
	11	12.36	-0.3	10.99	-0.7	11.52	-1.3
	12	12.4	0.7	10.99	-0.1	11.51	-1.3
	13	12.58	4.9	11.03	0.3	11.54	-1.2
	14	12.71	7.1	11.03	0.9	11.66	0.8
	15	12.74	8	11.04	1.2	11.7	1.5
	16	12.67	6.7	11.04	1.5	11.73	2.1
	17	12.61	5.4	11.07	1.5	11.74	2
	18	12.55	4.2	11.07	1.2	11.7	1.2
	19	12.5	2.9	11.05	1	11.67	0.3
	20	12.47	1.9	11.06	0.5	11.68	-0.3
	21	12.45	1	11.06	0.3	11.67	-0.5
	22	12.41	0.4	11.04	0	11.65	-0.8
	23	12.39	0	11.04	-0.1	11.64	-0.9
2014-01-07	0	7.84	-2.1	7.92	-2.2	7.23	-3.5
	1	7.7	-2.5	7.86	-2.3	7.22	-3.6
	2	7.58	-2.7	7.77	-2.3	7.15	-3.8
	3	7.5	-2.9	7.71	-2.6	7.1	-4.1
	4	7.4	-3.3	7.62	-2.8	7.03	-4.4
	5	7.26	-3.6	7.49	-3	7	-4.5
	6	7.24	-3.7	7.48	-3	6.93	-4.8
	7	7.14	-3.9	7.41	-3.3	6.92	-5
	8	7.06	-4.2	7.34	-3.4	6.87	-5.1
	9	7.01	-4.3	7.29	-3.5	6.85	-5
	10	7.03	-3.8	7.28	-3.2	6.88	-4.5
	11	7.12	-3	7.35	-2.7	7	-3.3
	12	7.24	-2.4	7.43	-2.2	7.08	-2.8
	13	7.31	-2.1	7.58	-1.7	7.26	-2.2
	14	7.47	-1.9	7.78	-1.3	7.38	-1.9
	15	7.59	-1.8	7.87	-1.2	7.52	-1.7
	16	7.66	-1.8	8.08	-1.3	7.66	-1.7
	17	7.73	-1.9	8.2	-1.5	7.7	-1.7
	18	7.76	-1.9	8.22	-1.8	7.75	-2
	19	7.77	-1.9	8.2	-1.9	7.74	-2.1
	20	7.77	-1.9	8.17	-2	7.74	-2
	21	7.77	-2	8.11	-2.1	7.73	-2.2
	22	7.77	-2.1	8.03	-2.2	7.67	-2.3
	23	7.75	-2.2	7.94	-2.4	7.64	-2.4
2014-03-06	0	10.05	-1.6	12	-1.5	12.8	-1.3
	1	10.03	-1.7	11.94	-1.6	12.77	-1.3
	2	10	-1.7	11.93	-1.6	12.76	-1.4
	3	9.99	-1.7	11.9	-1.6	12.74	-1.4
	4	9.96	-1.7	11.86	-1.6	12.7	-1.5
	5	9.93	-1.7	11.76	-1.6	12.67	-1.5
	6	9.92	-1.7	11.78	-1.6	12.68	-1.5
	7	9.9	-1.7	11.71	-1.7	12.68	-1.6
	8	9.88	-1.7	11.65	-1.6	12.63	-1.6
	9	9.9	-1.7	11.66	-1.6	12.63	-1.6
	10	9.9	-1.6	11.61	-1.5	12.62	-1.5
	11	10.01	-0.8	11.62	-1.5	12.67	-1
	12	10.18	1.5	11.87	0	12.69	-0.9
	13	10.2	2.5	11.9	0.1	12.75	0.6
	14	10.22	2.6	11.98	1.6	12.8	2.2
	15	10.21	3	11.95	1.6	12.89	4.8
	16	10.21	3.4	12.01	1.7	12.91	5.3
	17	10.17	2.9	12.01	1.6	12.9	5.5
	18	10.14	2.4	11.95	1.2	12.88	5.2
	19	10.1	1.5	11.94	0.5	12.78	4
	20	10.06	0.4	11.92	-0.6	12.72	3.1
	21	10.05	-0.2	11.87	-1.1	12.73	2.4
	22	10.04	-0.7	11.89	-1.2	12.64	1.5
	23	10.01	-0.9	11.87	-1.3	12.62	1
																				2

## Sheet: Tab 1
	SOC (mg/g)																																																7.71599
			CK	09	02						CK	09	02											CK	09	02		CK	09	02																			16.9105
		5	1.86	2.45333	2.99		10.23	13.4933	16.445		10.23±0.61	13.49±0.77	16.45±1.37									3013-11-28	5	22.3833	20.4567	20.8733		#REF!	#REF!	#REF!																			11.3297
		15	1.55333	2.03667	2.48		8.54333	11.2017	13.64		8.54±0.47	11.20±0.62	13.64±1.17										15	13.6	13.6267	12.19		#REF!	#REF!	#REF!																			10.1067
		25	1.36667	1.53	1.56667		7.51667	8.415	8.61667		7.52±0.47	8.42±0.42	8.62±0.38										25	15.25	18.9333	20.98		#REF!	#REF!	#REF!																			10.6297
																																																	7.24472
	TN (mg/g)																					3014-01-06	5	22.2167	18.7333	19.12		#REF!	#REF!	#REF!																			6.83337
			CK	09	02						CK	09	02										15	10.4967	11.23	10.69		#REF!	#REF!	#REF!																			13.3228
		5	0.317	0.463333	0.519667		1.1095	1.62167	1.81883		1.11±0.01	1.62±0.11	1.82±0.11										25	16.19	16.3033	19.5067		#REF!	#REF!	#REF!																			7.03611
		15	0.251333	0.359667	0.397667		0.879667	1.25883	1.39183		0.88±0.06	1.26±0.08	1.39±0.09																																				7.89556
		25	0.254	0.258	0.268333		0.889	0.903	0.939167		0.89±0.04	0.90±0.09	0.94±0.07									3014-03-07	5	11.0433	13.6433	13.8733		#REF!	#REF!	#REF!																			13.5115
																							15	9.13	9.48333	10.2533		#REF!	#REF!	#REF!																			12.2843
	C/N																						25	18.1333	16.6633	18.25		18.13±6.05	16.66±4.11	18.25±2.85																			4.8994
			CK	09	02						CK	09	02																																				13.5766
		5	5.92333	5.63667	6.23		9.22037	8.32066	9.04151		9.22±2.20	8.32±2.78	9.04±4.11
		15	6.66	5.99333	6.93333		9.71201	8.89845	9.80002		9.71±3.19	8.90±2.41	9.80±4.50
		25	5.26667	6.06667	6.02333		8.45519	9.31894	9.1748		8.46±1.14	9.32±0.85	9.17±1.89
																		SD																											12.8321
																			25	6.04885	4.11221	2.84799																							28.647
																																													17.7646
			Site	Layer	SOC (mg/g)	TN (mg/g)	C/N	pH																																					19.4471
			CK	0-10	10.23±0.61	1.11±0.01	9.22±2.20	7.53±0.08																																					11.6971
			09		13.49±0.77	1.62±0.11	8.32±2.78	7.22±0.05																																					27.9292
			02		16.45±1.37	1.82±0.11	9.04±4.11	7.13±0.12																																					17.546
			CK	10-20	8.54±0.47	0.88±0.06	9.71±3.19	-																																					13.0353
			09		11.20±0.62	1.26±0.08	8.90±2.41	-																																					11.0978
			02		13.64±1.17	1.39±0.09	9.80±4.50	-																																					4.65669
			CK	20-30	7.52±0.47	0.89±0.04	8.46±1.14	-																																					38.6388
			09		8.42±0.42	0.90±0.09	9.32±0.85	-																																					14.1775
			02		8.62±0.38	0.94±0.07	9.17±1.89	-																																					14.3983
																																													21.4102
																																													25.5662
																																													12.0017
																																													17.1808

## Sheet: Tab 2
			0-10		2020-10-01		20-30
	Date	Treatment	MBN	MBC	MBN	MBC	MBN	MBC
	2013-11-28	2	17.35	366.95	8.49	100.22	5.13	91.15
			(±1.88)	(±95.76)	(±1.74)	(±33.33)	(±1.95)	(±18.13)
		9	16.18	313.19	7.88	99.84	5.03	82.23
			(±3.18)	(±44.13)	(±2.43)	(±34.95)	(±1.64)	(±19.23)
		CK	12.3	259.46	5.97	75.33	3.71	54.52
			(±3.50)	(±62.69)	(±0.90)	(±25.17)	(±0.57)	(±3.45)
	2014-01-06	2	15.46	294.84	9.32	95.32	4.97	85.01
			(±2.47)	(±49.13)	(±1.46)	(±16.27)	(±1.92)	(±10.61)
		9	14.11	267.29	8.77	94.48	4.87	78.32
			(±1.27)	(±59.37)	(±1.82)	(±20.19)	(±0.38)	(±12.46)
		CK	9.27	191.56	6.97	84.08	3.81	53.74
			(±1.58)	(±45.82)	(±0.44)	(±14.75)	(±0.94)	(±16.29)
	2014-03-07	2	16.29	226.8	10.14	97.61	4.8	78.88
			(±0.95)	(±43.75)	(±1.99)	(±29.71)	(±1.97)	(±26.84)
		9	15.15	208.31	9.66	88.44	4.7	74.41
			(±1.87)	(±44.20)	(±1.46)	(±16.73)	(±1.34)	(±11.14)
		CK	13.89	154.09	7.97	69.67	3.91	52.96
			(±3.06)	(±36.30)	(±1.12)	(±11.94)	(±1.49)	(±29.27)
	LSD0.05		4.95	117.7	3.34	50.31	3.09	38.01
	Date	Treatment	0-10		10-20		20-30
			MBN	MBC	MBN	MBC	MBN	MBC
	November 28th 2013	CK	12.30±3.50	259.46±62.69	5.97±0.90	75.33±25.17	3.71±0.57	54.52±3.45
		4 year	16.18±3.18	313.19±44.13	7.88±2.43	99.84±34.95	5.03±1.64	82.23±19.23
		11 year	17.35±1.88	366.95±95.76	8.49±1.74	100.22±33.33	5.13±1.95	91.15±18.13
	January 7th 2014	CK	9.27±1.58	191.56±45.82	6.97±0.44	84.08±14.75	3.81±0.94	53.74±16.29
		4 year	14.11±1.27	267.29±59.37	8.77±1.82	94.48±20.19	4.87±0.38	78.32±12.46
		11 year	15.46±2.47	294.84±49.13	9.32±1.46	95.32±16.27	4.97±1.92	85.01±10.61
	March 6th 2014	CK	13.89±3.06	154.09±36.30	7.97±1.12	69.67±11.94	3.91±1.49	52.96±29.27
		4 year	15.15±1.87	208.31±44.20	9.66±1.46	88.44±16.73	4.70±1.34	74.41±11.14
		11 year	16.29±0.95	226.80±43.75	10.14±1.99	97.61±29.71	4.80±1.97	78.88±26.84
	LSD0.05		4.95	117.7	3.34	50.31	3.09	38.01
	Date	Treatment	MBN			MBC
			0-10	10-20	20-30	0-10	10-20	20-30
	November 28th 2013	CK	12.30±3.50	5.97±0.90	3.71±0.57	259.46±62.69	75.33±25.17	54.52±3.45
		4 year	16.18±3.18	7.88±2.43	5.03±1.64	313.19±44.13	99.84±34.95	82.23±19.23
		11 year	17.35±1.88	8.49±1.74	5.13±1.95	366.95±95.76	100.22±33.33	91.15±18.13
	January 7th 2014	CK	9.27±1.58	6.97±0.44	3.81±0.94	191.56±45.82	84.08±14.75	53.74±16.29
		4 year	14.11±1.27	8.77±1.82	4.87±0.38	267.29±59.37	94.48±20.19	78.32±12.46
		11 year	15.46±2.47	9.32±1.46	4.97±1.92	294.84±49.13	95.32±16.27	85.01±10.61
	March 6th 2014	CK	13.89±3.06	7.97±1.12	3.91±1.49	154.09±36.30	69.67±11.94	52.96±29.27
		4 year	15.15±1.87	9.66±1.46	4.70±1.34	208.31±44.20	88.44±16.73	74.41±11.14
		11 year	16.29±0.95	10.14±1.99	4.80±1.97	226.80±43.75	97.61±29.71	78.88±26.84
	LSD0.05		4.95	3.34	3.09	117.7	50.31	38.01

## Sheet: Tab 3
	Date	Treatment	Nitrite	Nitrate	Denitrifying
	2013-11-28	CK	9.38±2.38	12.77±3.80	14.18±2.54
		9	6.35±2.16	15.97±2.17	19.39±2.11
		2	3.62±1.30	11.96±2.88	15.55±4.60
	2014-01-07	CK	3.53±1.33	15.50±2.11	23.30±7.28
		9	8.41±1.57	15.55±1.83	23.68±4.88
		2	3.43±1.50	10.31±2.63	28.00±5.35
	2014-03-06	CK	6.80±1.38	14.22±5.70	18.88±6.96
		9	7.67±2.30	11.62±3.97	31.47±8.88
		2	4.84±0.48	13.75±3.72	20.30±5.61
	LSD0.05		3.57	3.57	12.05

## Sheet: Tab 4
	Layer (cm)	0-10				2020-10-01				20-30
	Factor	1	2	3	4	1	2	3	4	1	2	3	4
	W	0.292	-0.126	-0.133	0.245	0.001	-0.343	0.447	-0.035	-0.11	-0.028	0.448	0.248
	T	0.285	-0.082	-0.251	0.184	0.096	-0.43	0.25	0.232	-0.062	0.014	0.479	0.203
	MBC	0.198	0.254	0.157	-0.102	0.233	0.256	0.212	0.347	0.19	0.374	0.043	0.02
	MBN	0.247	-0.061	0.302	-0.26	-0.221	0.213	0.256	0.404	0.283	-0.209	0.117	-0.149
	MBC/MBN	0.011	0.319	-0.105	0.138	0.324	0.046	0.055	0.034	-0.115	0.424	-0.057	0.117
	MBC/SOC	0.117	0.248	0.022	0.055	0.253	0.188	0.164	-0.081	0.271	0.252	0.088	0.074
	MBN/TN	0.214	-0.078	0.088	-0.434	-0.236	0.011	0.152	0.052	0.321	-0.106	0.122	-0.055
	NH4+-N	0.064	-0.214	0.238	0.363	-0.109	0.255	0.298	0.103	0.196	-0.009	-0.171	0.491
	NO3--N	0.126	0.217	0.085	0.32	0.024	-0.129	-0.317	0.777	0.011	0.168	0.164	-0.617
	BacteriaNitrite	0.079	-0.158	-0.266	0.031	-	-	-	-	-	-	-	-
	BacteriaNitrate	-0.076	0.015	-0.252	-0.103	-	-	-	-	-	-	-	-
	BacteriaDenitrifying	-0.11	-0.081	0.362	0.258	-	-	-	-	-	-	-	-

## Sheet: Fig 2
			CK	4-year	11-year			LSD0.05
	3013-11-28	5	0.919333	2.51667	1.90233		5	0.909	0.4545
		15	0.889	1.484	1.222		5	0.606	0.303
		25	0.697	1.25167	1.04133		5	1.025	0.5125
	3014-01-06	5	1.296	1.744	3.77067		7.5	1.085	0.5425
		15	1.30517	4.26633	4.7685		7.5	1.195	0.5975
		25	0.793667	4.32067	4.00367		7.5	0.977	0.4885
	3014-03-07	5	1.70067	7.9938	8.844		4	4.127	2.0635
		15	1.72133	7.04867	8.315		4	2.524	1.262
		25	0.890333	7.38967	6.966		4	2.061	1.0305
	SE
	3013-11-28	5	0.163448	0.415929	0.0841909
		15	0.0816639	0.275725	0.0967281
		25	0.167885	0.478128	0.0794677
	3014-01-06	5	0.0372872	0.232869	0.489207
		15	0.421718	0.581945	0.0483641
		25	0.0999745	0.72865	0.201044
	3014-03-07	5	0.268574	0.869557	0.835891
		15	0.47672	0.761773	0.888164
		25	0.0320642	0.979172	0.322621

## Sheet: Fig 3
				CK	4-year	11-year			LSD0.05
		3013-11-28	5	6.45667	10.3367	10.772		12.5	4.16	2.08
			15	4.43467	6.99833	7.79567		12.5	3.108	1.554
			25	4.66167	5.078	5.97112		12.5	2.438	1.219
		3014-01-06	5	9.91533	4.86	5.501		12.5	3.254	1.627
			15	3.41067	5.60183	5.54583		12.5	2.425	1.2125
			25	3.55217	3.86717	4.28857		12.5	3.285	1.6425
		3014-03-07	5	2.98333	9.24033	8.92655		12.5	3.969	1.9845
			15	2.38667	4.20533	3.296		12.5	2.581	1.2905
			25	2.44267	2.65633	2.60601		12.5	1.488	0.744
		SE
		3013-11-28	5	0.87135	1.2875	1.38526
			15	0.50128	0.759338	1.26157
			25	0.640939	1.01745	1.20775
		3014-01-06	5	1.1338	0.908719	0.736163
			15	0.535382	0.891255	0.903565
			25	0.678755	0.598783	0.65125
		3014-03-07	5	0.763348	1.58028	0.930964
			15	0.569483	1.02317	0.545556
			25	0.716572	0.180113	0.0947529
